# Supplementary material for: Ladder polysilsesquioxane for wide-band semiconductors: synthesis, optical properties and doped electrophosphorescent device
Source: Royal Society of Chemistry journal article supplement (doi:10.1039/c1jm11087j), 2011-01-01
Supplement: c1jm11087j.pdf [file c1jm11087j.pdf]

## Supporting Information

### Supporting Figures

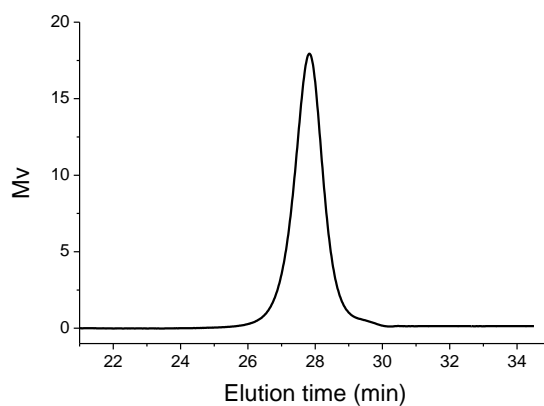

Figure S1. GPC of Tp-LPSQ

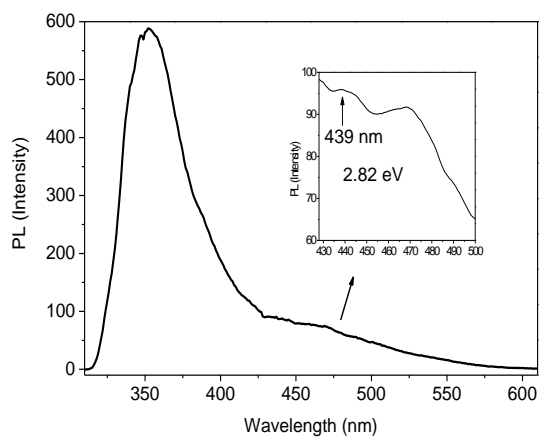

Figure S2. PL of Tp-LPSQ in dichloromethane solution at 77k

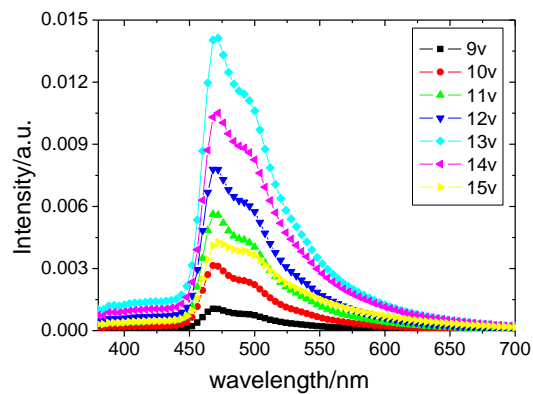

Figure S3. EL spectra with different voltages for device ITO:PEDT/PVK/ TP:FlrPic /TPBi/LiF:Al

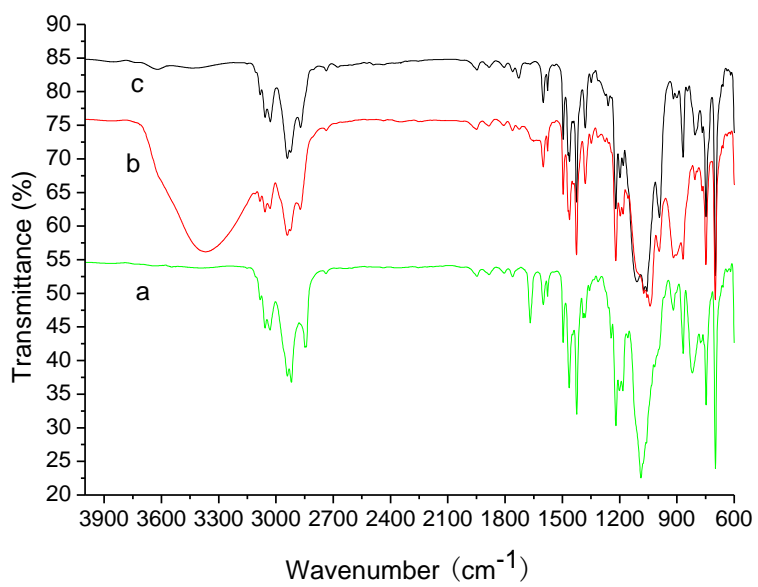

Figure S4. IR spectra of a. M<sub>1</sub>; b. M<sub>2</sub>; c. Tp-LPSQ.
